# Supplementary material
Source: PubMed Central journal article supplement (PMC5549630)
Supplement: NIHMS757974-supplement-supp_datafile1.pdf [file NIHMS757974-supplement-supp_datafile1.pdf]

# Cys25: IFSAGVSAACLADIITFPLDTAK

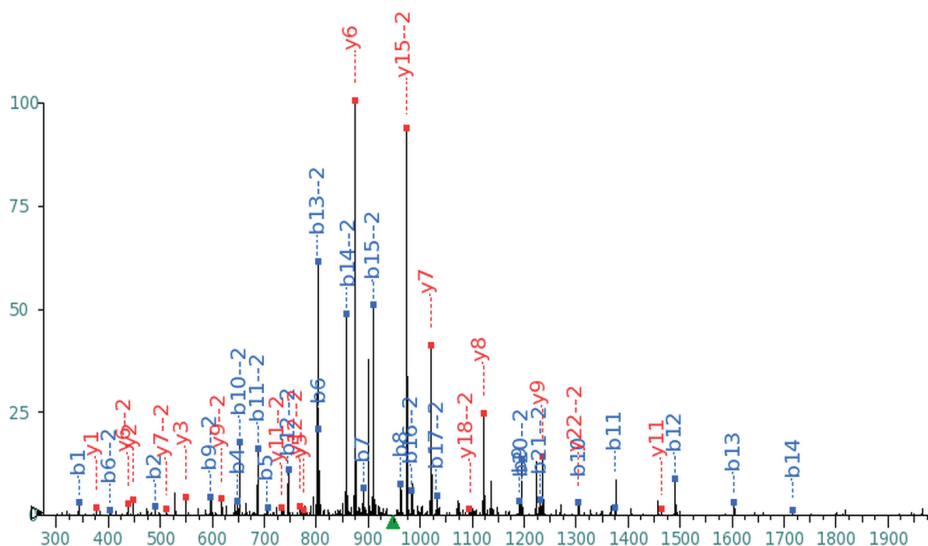

Predicted Fragmentation Pattern

| +1  |    |                   |          |          |                   | +2 |     |    |                   |          |          |                   |    |
|-----|----|-------------------|----------|----------|-------------------|----|-----|----|-------------------|----------|----------|-------------------|----|
| Seq | #  | b: $\Delta$ Error | b        | y        | y: $\Delta$ Error | +1 | Seq | #  | b: $\Delta$ Error | b        | y        | y: $\Delta$ Error | +1 |
| I   | 1  | 524.631           | 343.254  | ---      | ---               | 22 | I   | 1  | ---               | 172.131  | ---      | ---               | 22 |
| F   | 2  | 162.185           | 490.323  | 2494.310 | ---               | 21 | F   | 2  | ---               | 245.665  | 1247.659 | ---               | 21 |
| S   | 3  | ---               | 577.355  | 2347.242 | ---               | 20 | S   | 3  | ---               | 289.181  | 1174.124 | ---               | 20 |
| A   | 4  | 461.631           | 648.392  | 2260.210 | ---               | 19 | A   | 4  | ---               | 324.700  | 1130.608 | ---               | 19 |
| G   | 5  | 601.380           | 705.413  | 2189.173 | ---               | 18 | G   | 5  | ---               | 353.210  | 1095.090 | -294.197          | 18 |
| V   | 6  | 126.665           | 804.482  | 2132.151 | ---               | 17 | V   | 6  | 2315.021          | 402.744  | 1066.579 | ---               | 17 |
| S   | 7  | 219.920           | 891.514  | 2033.083 | ---               | 16 | S   | 7  | ---               | 446.261  | 1017.045 | ---               | 16 |
| A   | 8  | 100.235           | 962.551  | 1946.051 | ---               | 15 | A   | 8  | ---               | 481.779  | 973.529  | 430.385           | 15 |
| C   | 9  | 49.480            | 1190.608 | 1875.014 | ---               | 14 | C   | 9  | 1243.727          | 595.807  | 938.010  | ---               | 14 |
| L   | 10 | 267.627           | 1303.692 | 1646.957 | ---               | 13 | L   | 10 | 506.510           | 652.350  | 823.982  | ---               | 13 |
| A   | 11 | 181.283           | 1374.729 | 1533.873 | ---               | 12 | A   | 11 | 912.326           | 687.868  | 767.440  | 23.401            | 12 |
| D   | 12 | 170.915           | 1489.756 | 1462.835 | 192.384           | 11 | D   | 12 | 1237.021          | 745.382  | 731.921  | 1052.135          | 11 |
| I   | 13 | 87.923            | 1602.840 | 1347.809 | ---               | 10 | I   | 13 | 920.092           | 801.924  | 674.408  | ---               | 10 |
| I   | 14 | 87.844            | 1715.924 | 1234.724 | 78.221            | 9  | I   | 14 | 704.462           | 858.466  | 617.866  | 861.803           | 9  |
| T   | 15 | ---               | 1816.972 | 1121.640 | 91.618            | 8  | T   | 15 | 412.291           | 908.989  | 561.324  | ---               | 8  |
| F   | 16 | ---               | 1964.040 | 1020.593 | 140.099           | 7  | F   | 16 | 180.136           | 982.524  | 510.800  | 57.218            | 7  |
| P   | 17 | ---               | 2061.093 | 873.524  | 121.554           | 6  | P   | 17 | 737.764           | 1031.050 | 437.266  | 898.715           | 6  |
| L   | 18 | ---               | 2174.177 | 776.472  | 91.045            | 5  | L   | 18 | ---               | 1087.592 | 388.739  | ---               | 5  |
| D   | 19 | ---               | 2289.204 | 663.387  | ---               | 4  | D   | 19 | ---               | 1145.106 | 332.197  | ---               | 4  |
| T   | 20 | ---               | 2390.252 | 548.361  | 292.212           | 3  | T   | 20 | 422.814           | 1195.629 | 274.684  | ---               | 3  |
| A   | 21 | ---               | 2461.289 | 447.313  | 179.774           | 2  | A   | 21 | 354.641           | 1231.148 | 224.160  | ---               | 2  |
| K   | 22 | ---               | ---      | 376.276  | 636.399           | 1  | K   | 22 | ---               | ---      | 188.642  | ---               | 1  |

# Cys188: NVIINCTELVTDLM\*K

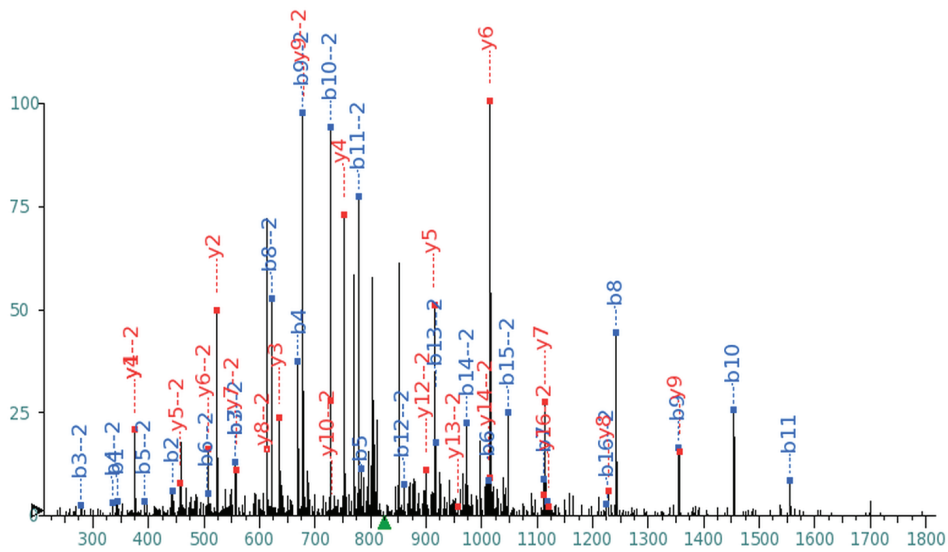

Predicted Fragmentation Pattern

| +1    |            |          |          |            |    |  | +2    |            |          |          |            |    |  |
|-------|------------|----------|----------|------------|----|--|-------|------------|----------|----------|------------|----|--|
| Seq # | b: Δ Error | b        | y        | y: Δ Error | +1 |  | Seq # | b: Δ Error | b        | y        | y: Δ Error | +1 |  |
| N 1   | 262.271    | 344.213  | ---      | ---        | 16 |  | N 1   | ---        | 172.610  | ---      | ---        | 16 |  |
| V 2   | -571.862   | 443.282  | 2125.112 | ---        | 15 |  | V 2   | ---        | 222.144  | 1063.060 | ---        | 15 |  |
| I 3   | 88.829     | 556.366  | 2026.044 | ---        | 14 |  | I 3   | -2061.339  | 278.686  | 1013.526 | 761.779    | 14 |  |
| I 4   | -281.210   | 669.450  | 1912.960 | ---        | 13 |  | I 4   | 872.473    | 335.228  | 956.984  | 328.358    | 13 |  |
| N 5   | 311.288    | 783.493  | 1799.876 | ---        | 12 |  | N 5   | 935.072    | 392.250  | 900.441  | 234.255    | 12 |  |
| C 6   | 99.278     | 1011.549 | 1685.833 | ---        | 11 |  | C 6   | 1731.522   | 506.278  | 843.420  | ---        | 11 |  |
| T 7   | 145.263    | 1112.597 | 1457.776 | ---        | 10 |  | T 7   | -695.834   | 556.802  | 729.392  | -1127.578  | 10 |  |
| E 8   | 100.491    | 1241.640 | 1356.728 | -714.417   | 9  |  | E 8   | 456.938    | 621.324  | 678.868  | -1041.958  | 9  |  |
| L 9   | 135.917    | 1354.724 | 1227.686 | 127.488    | 8  |  | L 9   | 435.874    | 677.866  | 614.346  | -1546.508  | 8  |  |
| V 10  | 80.195     | 1453.792 | 1114.602 | 213.954    | 7  |  | V 10  | 306.554    | 727.400  | 557.804  | -519.208   | 7  |  |
| T 11  | 134.671    | 1554.840 | 1015.533 | 106.661    | 6  |  | T 11  | 406.564    | 777.924  | 508.270  | 510.557    | 6  |  |
| Y 12  | ---        | 1717.903 | 914.485  | 101.841    | 5  |  | Y 12  | 588.177    | 859.455  | 457.746  | 328.493    | 5  |  |
| D 13  | ---        | 1832.930 | 751.422  | 157.035    | 4  |  | D 13  | 1047.814   | 916.969  | 376.215  | 548.248    | 4  |  |
| L 14  | ---        | 1946.014 | 636.395  | 208.368    | 3  |  | L 14  | 472.993    | 973.511  | 318.701  | ---        | 3  |  |
| M* 15 | ---        | 2093.050 | 523.311  | 12.404     | 2  |  | M* 15 | 414.402    | 1047.028 | 262.159  | ---        | 2  |  |
| K 16  | ---        | ---      | 376.276  | 386.123    | 1  |  | K 16  | ---        | ---      | 188.642  | ---        | 1  |  |

Cys213/224: ILADDVPCHELLSALVAGFCTTLLASPVDVVK

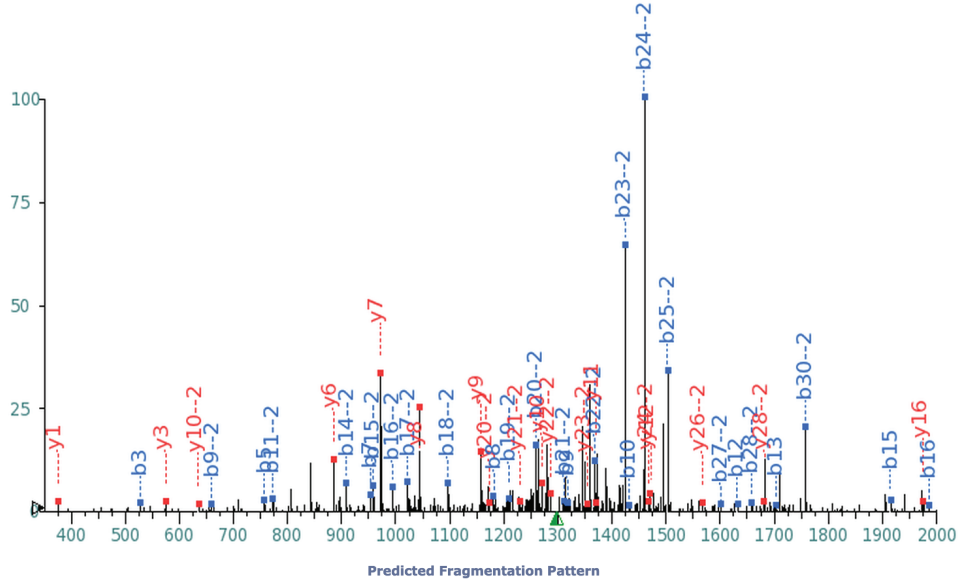

| +1  |    |                 |                 |                 |                 | +2 |     |    |                 |                 |                 |                 |    |
|-----|----|-----------------|-----------------|-----------------|-----------------|----|-----|----|-----------------|-----------------|-----------------|-----------------|----|
| Seq | #  | b: Δ Error      | b               | y               | y: Δ Error      | +1 | Seq | #  | b: Δ Error      | b               | y               | y: Δ Error      | +1 |
| I   | 1  | ---             | 343.254         | ---             | ---             | 31 | I   | 1  | ---             | 172.131         | ---             | ---             | 31 |
| L   | 2  | ---             | 456.338         | 3546.879        | ---             | 30 | L   | 2  | ---             | 228.673         | 1773.943        | ---             | 30 |
| A   | 3  | <b>171.908</b>  | <b>527.375</b>  | 3433.795        | ---             | 29 | A   | 3  | ---             | 264.191         | 1717.401        | ---             | 29 |
| D   | 4  | ---             | 642.402         | 3362.758        | ---             | 28 | D   | 4  | ---             | 321.705         | <b>1681.883</b> | <b>-255.949</b> | 28 |
| D   | 5  | <b>103.276</b>  | <b>757.429</b>  | 3247.731        | ---             | 27 | D   | 5  | ---             | 379.218         | 1624.369        | ---             | 27 |
| V   | 6  | ---             | 856.498         | 3132.704        | ---             | 26 | V   | 6  | ---             | 428.753         | <b>1566.856</b> | <b>475.257</b>  | 26 |
| P   | 7  | <b>787.027</b>  | <b>953.551</b>  | 3033.635        | ---             | 25 | P   | 7  | ---             | 477.279         | 1517.321        | ---             | 25 |
| C   | 8  | <b>-791.830</b> | <b>1181.607</b> | 2936.583        | ---             | 24 | C   | 8  | ---             | 591.307         | <b>1468.795</b> | <b>-223.489</b> | 24 |
| H   | 9  | <b>208.589</b>  | <b>1318.666</b> | 2708.526        | ---             | 23 | H   | 9  | <b>-573.910</b> | <b>659.837</b>  | <b>1354.767</b> | <b>92.475</b>   | 23 |
| L   | 10 | <b>-531.184</b> | <b>1431.750</b> | 2571.467        | ---             | 22 | L   | 10 | ---             | 716.379         | <b>1286.237</b> | <b>-434.976</b> | 22 |
| L   | 11 | ---             | 1544.834        | 2458.383        | ---             | 21 | L   | 11 | <b>451.791</b>  | <b>772.921</b>  | <b>1229.695</b> | <b>-608.487</b> | 21 |
| S   | 12 | <b>299.881</b>  | <b>1631.866</b> | 2345.299        | ---             | 20 | S   | 12 | ---             | 816.437         | <b>1173.153</b> | <b>-784.097</b> | 20 |
| A   | 13 | <b>248.110</b>  | <b>1702.904</b> | 2258.267        | ---             | 19 | A   | 13 | ---             | 851.955         | 1129.637        | ---             | 19 |
| L   | 14 | ---             | 1815.988        | 2187.230        | ---             | 18 | L   | 14 | <b>323.701</b>  | <b>908.497</b>  | 1094.118        | ---             | 18 |
| V   | 15 | <b>41.491</b>   | <b>1915.056</b> | 2074.146        | ---             | 17 | V   | 15 | <b>396.898</b>  | <b>958.032</b>  | 1037.576        | ---             | 17 |
| A   | 16 | <b>217.217</b>  | <b>1986.093</b> | <b>1975.077</b> | <b>-11.753</b>  | 16 | A   | 16 | <b>59.911</b>   | <b>993.550</b>  | 988.042         | ---             | 16 |
| G   | 17 | ---             | 2043.115        | 1904.040        | ---             | 15 | G   | 17 | <b>386.253</b>  | <b>1022.061</b> | 952.524         | ---             | 15 |
| F   | 18 | ---             | 2190.183        | 1847.019        | ---             | 14 | F   | 18 | <b>666.679</b>  | <b>1095.595</b> | 924.013         | ---             | 14 |
| C   | 19 | ---             | 2418.240        | 1699.950        | ---             | 13 | C   | 19 | <b>151.311</b>  | <b>1209.624</b> | 850.479         | ---             | 13 |
| T   | 20 | ---             | 2519.288        | <b>1471.893</b> | <b>-613.427</b> | 12 | T   | 20 | <b>-560.967</b> | <b>1260.147</b> | 736.450         | ---             | 12 |
| T   | 21 | ---             | 2620.335        | <b>1370.846</b> | <b>291.774</b>  | 11 | T   | 21 | <b>265.368</b>  | <b>1310.671</b> | 685.926         | ---             | 11 |
| L   | 22 | ---             | 2733.419        | <b>1269.798</b> | <b>310.910</b>  | 10 | L   | 22 | <b>575.077</b>  | <b>1367.213</b> | <b>635.403</b>  | <b>258.476</b>  | 10 |
| L   | 23 | ---             | 2846.503        | <b>1156.714</b> | <b>114.890</b>  | 9  | L   | 23 | <b>544.344</b>  | <b>1423.755</b> | 578.861         | ---             | 9  |
| A   | 24 | ---             | 2917.540        | <b>1043.630</b> | <b>113.732</b>  | 8  | A   | 24 | <b>582.573</b>  | <b>1459.274</b> | 522.319         | ---             | 8  |
| S   | 25 | ---             | 3004.573        | <b>972.593</b>  | <b>122.670</b>  | 7  | S   | 25 | <b>536.406</b>  | <b>1502.790</b> | 486.800         | ---             | 7  |
| P   | 26 | ---             | 3101.625        | <b>885.561</b>  | <b>32.374</b>   | 6  | P   | 26 | ---             | 1551.316        | 443.284         | ---             | 6  |
| V   | 27 | ---             | 3200.694        | 788.508         | ---             | 5  | V   | 27 | <b>228.160</b>  | <b>1600.850</b> | 394.758         | ---             | 5  |
| D   | 28 | ---             | 3315.721        | 689.440         | ---             | 4  | D   | 28 | <b>436.344</b>  | <b>1658.364</b> | 345.223         | ---             | 4  |
| V   | 29 | ---             | 3414.789        | <b>574.413</b>  | <b>71.245</b>   | 3  | V   | 29 | ---             | 1707.898        | 287.710         | ---             | 3  |
| V   | 30 | ---             | 3513.857        | 475.344         | ---             | 2  | V   | 30 | <b>556.617</b>  | <b>1757.432</b> | 238.176         | ---             | 2  |
| K   | 31 | ---             | ---             | <b>376.276</b>  | <b>-230.416</b> | 1  | K   | 31 | ---             | ---             | 188.642         | ---             | 1  |

# Cys253: FINSLPGQYPSVPSAM\*SM\*YTK

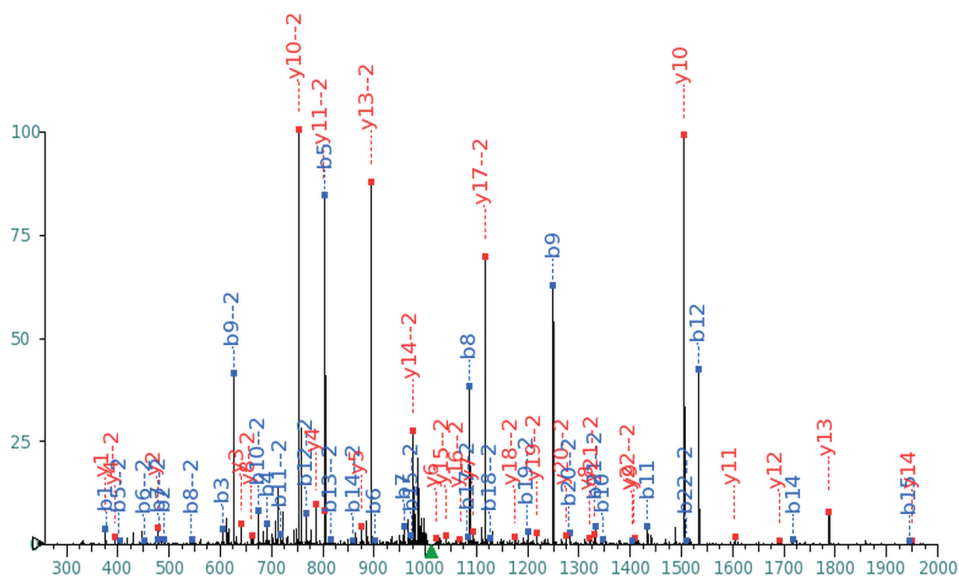

Predicted Fragmentation Pattern

| +1    |                   |                 |                 |                   |    | +2    |                   |                 |                 |                   |    |
|-------|-------------------|-----------------|-----------------|-------------------|----|-------|-------------------|-----------------|-----------------|-------------------|----|
| Seq # | b: $\Delta$ Error | b               | y               | y: $\Delta$ Error | +1 | Seq # | b: $\Delta$ Error | b               | y               | y: $\Delta$ Error | +1 |
| F 1   | -2218.029         | <b>377.239</b>  | ---             | ---               | 22 | F 1   | ---               | 189.123         | ---             | ---               | 22 |
| I 2   | 215.629           | <b>490.323</b>  | 2660.261        | ---               | 21 | I 2   | ---               | 245.665         | <b>1330.634</b> | <b>323.100</b>    | 21 |
| N 3   | 223.522           | <b>604.366</b>  | 2547.177        | ---               | 20 | N 3   | ---               | 302.686         | <b>1274.092</b> | <b>161.072</b>    | 20 |
| S 4   | 161.879           | <b>691.398</b>  | 2433.134        | ---               | 19 | S 4   | ---               | 346.202         | <b>1217.071</b> | <b>592.139</b>    | 19 |
| L 5   | 162.313           | <b>804.482</b>  | 2346.102        | ---               | 18 | L 5   | 2198.855          | <b>402.744</b>  | <b>1173.555</b> | 27.715            | 18 |
| P 6   | 568.994           | <b>901.534</b>  | 2233.018        | ---               | 17 | P 6   | 278.814           | <b>451.271</b>  | <b>1117.012</b> | 375.440           | 17 |
| G 7   | 146.530           | <b>958.556</b>  | 2135.965        | ---               | 16 | G 7   | -974.369          | <b>479.782</b>  | <b>1068.486</b> | -591.355          | 16 |
| Q 8   | 106.703           | <b>1086.615</b> | 2078.943        | ---               | 15 | Q 8   | 1568.204          | <b>543.811</b>  | <b>1039.975</b> | 410.281           | 15 |
| Y 9   | 71.218            | <b>1249.678</b> | <b>1950.885</b> | 27.725            | 14 | Y 9   | 492.216           | <b>625.343</b>  | <b>975.946</b>  | 371.190           | 14 |
| P 10  | 716.727           | <b>1346.731</b> | <b>1787.822</b> | 96.666            | 13 | P 10  | 207.308           | <b>673.869</b>  | <b>894.414</b>  | 376.974           | 13 |
| S 11  | 122.631           | <b>1433.763</b> | <b>1690.769</b> | 156.800           | 12 | S 11  | 586.276           | <b>717.385</b>  | 845.888         | ---               | 12 |
| V 12  | 99.781            | <b>1532.831</b> | <b>1603.737</b> | 612.551           | 11 | V 12  | 389.851           | <b>766.919</b>  | <b>802.372</b>  | 437.423           | 11 |
| P 13  | ---               | 1629.884        | <b>1504.668</b> | 99.044            | 10 | P 13  | 985.104           | <b>815.446</b>  | <b>752.838</b>  | 399.156           | 10 |
| S 14  | 102.902           | <b>1716.916</b> | <b>1407.616</b> | 186.087           | 9  | S 14  | -61.692           | <b>858.962</b>  | 704.311         | ---               | 9  |
| C 15  | -461.537          | <b>1944.973</b> | <b>1320.584</b> | 134.531           | 8  | C 15  | -1022.404         | <b>972.990</b>  | <b>660.795</b>  | 870.990           | 8  |
| A 16  | ---               | 2016.010        | <b>1092.527</b> | 101.599           | 7  | A 16  | ---               | 1008.509        | 546.767         | ---               | 7  |
| M* 17 | ---               | 2163.045        | <b>1021.490</b> | 145.107           | 6  | M* 17 | 634.640           | <b>1082.026</b> | 511.248         | ---               | 6  |
| S 18  | ---               | 2250.077        | <b>874.454</b>  | 163.640           | 5  | S 18  | 290.662           | <b>1125.542</b> | 437.731         | ---               | 5  |
| M* 19 | ---               | 2397.113        | <b>787.422</b>  | -1023.468         | 4  | M* 19 | 581.052           | <b>1199.060</b> | <b>394.215</b>  | <b>461.435</b>    | 4  |
| Y 20  | ---               | 2560.176        | <b>640.387</b>  | 153.387           | 3  | Y 20  | 298.313           | <b>1280.592</b> | 320.697         | ---               | 3  |
| T 21  | ---               | 2661.224        | <b>477.323</b>  | 98.855            | 2  | T 21  | 647.490           | <b>1331.115</b> | 239.165         | ---               | 2  |
| K 22  | ---               | ---             | <b>376.276</b>  | 340.090           | 1  | K 22  | ---               | ---             | 188.642         | ---               | 1  |

# Cys253: FINSLPGQYPSVPSC#AM\*SM\*YTK

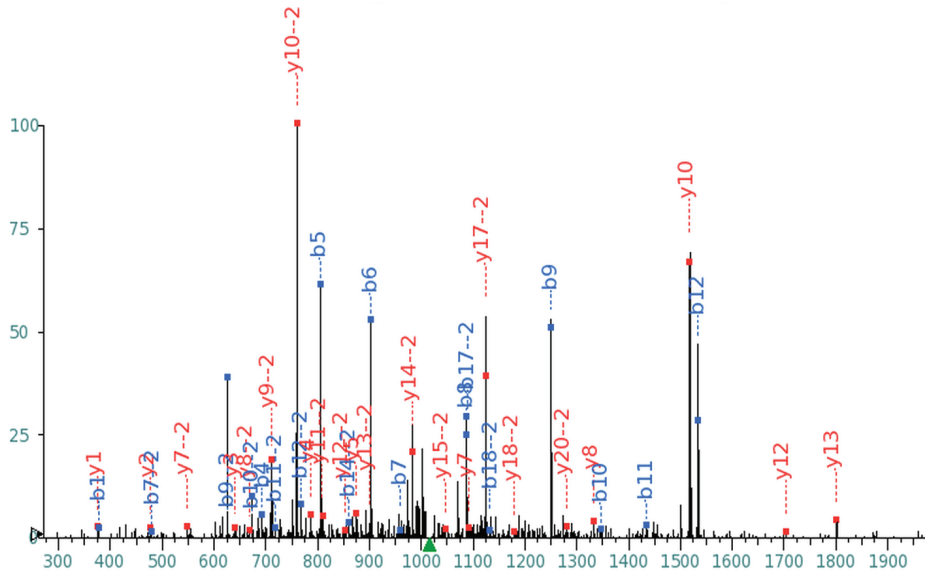

Predicted Fragmentation Pattern

| +1    |                 |                 |                 |                  |    | +2    |                 |                 |                 |                 |    |
|-------|-----------------|-----------------|-----------------|------------------|----|-------|-----------------|-----------------|-----------------|-----------------|----|
| Seq # | b: Δ Error      | b               | y               | y: Δ Error       | +1 | Seq # | b: Δ Error      | b               | y               | y: Δ Error      | +1 |
| F 1   | -2233.224       | <b>377.239</b>  | ---             | ---              | 22 | F 1   | ---             | 189.123         | ---             | ---             | 22 |
| I 2   | ---             | 490.323         | 2673.281        | ---              | 21 | I 2   | ---             | 245.665         | 1337.144        | ---             | 21 |
| N 3   | ---             | 604.366         | 2560.197        | ---              | 20 | N 3   | ---             | 302.686         | <b>1280.602</b> | <b>-511.107</b> | 20 |
| S 4   | <b>86.067</b>   | <b>691.398</b>  | 2446.154        | ---              | 19 | S 4   | ---             | 346.202         | 1223.581        | ---             | 19 |
| L 5   | <b>112.632</b>  | <b>804.482</b>  | 2359.122        | ---              | 18 | L 5   | ---             | 402.744         | <b>1180.065</b> | <b>-463.447</b> | 18 |
| P 6   | <b>-262.124</b> | <b>901.534</b>  | 2246.038        | ---              | 17 | P 6   | ---             | 451.271         | <b>1123.523</b> | <b>447.243</b>  | 17 |
| G 7   | <b>26.143</b>   | <b>958.556</b>  | 2148.985        | ---              | 16 | G 7   | <b>-348.219</b> | <b>479.782</b>  | 1074.996        | ---             | 16 |
| Q 8   | <b>166.901</b>  | <b>1086.615</b> | 2091.964        | ---              | 15 | Q 8   | ---             | 543.811         | <b>1046.486</b> | <b>548.906</b>  | 15 |
| Y 9   | <b>75.027</b>   | <b>1249.678</b> | 1963.905        | ---              | 14 | Y 9   | <b>644.011</b>  | <b>625.343</b>  | <b>982.456</b>  | <b>381.388</b>  | 14 |
| P 10  | <b>-554.048</b> | <b>1346.731</b> | <b>1800.842</b> | <b>201.198</b>   | 13 | P 10  | <b>358.119</b>  | <b>673.869</b>  | <b>900.925</b>  | <b>414.520</b>  | 13 |
| S 11  | <b>239.571</b>  | <b>1433.763</b> | <b>1703.789</b> | <b>566.259</b>   | 12 | S 11  | <b>1182.991</b> | <b>717.385</b>  | <b>852.398</b>  | <b>309.263</b>  | 12 |
| V 12  | <b>110.928</b>  | <b>1532.831</b> | 1616.757        | ---              | 11 | V 12  | <b>412.594</b>  | <b>766.919</b>  | <b>808.882</b>  | <b>473.624</b>  | 11 |
| P 13  | ---             | 1629.884        | <b>1517.689</b> | <b>66.419</b>    | 10 | P 13  | ---             | 815.446         | <b>759.348</b>  | <b>293.635</b>  | 10 |
| S 14  | ---             | 1716.916        | 1420.636        | ---              | 9  | S 14  | <b>686.638</b>  | <b>858.962</b>  | <b>710.822</b>  | <b>823.414</b>  | 9  |
| C# 15 | ---             | 1957.993        | <b>1333.604</b> | <b>69.877</b>    | 8  | C# 15 | ---             | 979.500         | <b>667.306</b>  | <b>1274.937</b> | 8  |
| A 16  | ---             | 2029.030        | <b>1092.527</b> | <b>-734.910</b>  | 7  | A 16  | ---             | 1015.019        | <b>546.767</b>  | <b>747.334</b>  | 7  |
| M* 17 | ---             | 2176.066        | 1021.490        | ---              | 6  | M* 17 | <b>-753.550</b> | <b>1088.536</b> | 511.248         | ---             | 6  |
| S 18  | ---             | 2263.098        | <b>874.454</b>  | <b>-908.208</b>  | 5  | S 18  | <b>-35.343</b>  | <b>1132.052</b> | 437.731         | ---             | 5  |
| M* 19 | ---             | 2410.133        | <b>787.422</b>  | <b>-990.381</b>  | 4  | M* 19 | ---             | 1205.570        | 394.215         | ---             | 4  |
| Y 20  | ---             | 2573.196        | <b>640.387</b>  | <b>199.500</b>   | 3  | Y 20  | ---             | 1287.102        | 320.697         | ---             | 3  |
| T 21  | ---             | 2674.244        | <b>477.323</b>  | <b>489.970</b>   | 2  | T 21  | ---             | 1337.626        | 239.165         | ---             | 2  |
| K 22  | ---             | ---             | <b>376.276</b>  | <b>-1360.941</b> | 1  | K 22  | ---             | ---             | 188.642         | ---             | 1  |

### Cys307: QTVDCTT

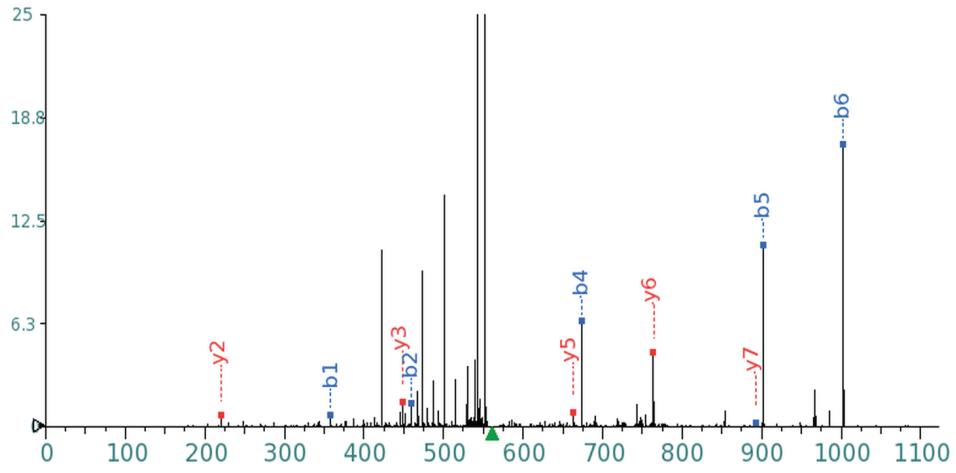

Predicted Fragmentation Pattern

| Seq | # | b: $\Delta$<br>Error | b        | y       | y: $\Delta$<br>Error | +1 |
|-----|---|----------------------|----------|---------|----------------------|----|
| Q   | 1 | 86.474               | 358.229  | ---     | ---                  | 7  |
| T   | 2 | 259.928              | 459.276  | 764.313 | -877.014             | 6  |
| V   | 3 | ---                  | 558.345  | 663.265 | -895.775             | 5  |
| D   | 4 | 212.154              | 673.372  | 564.197 | ---                  | 4  |
| C   | 5 | 72.609               | 901.429  | 449.170 | 160.957              | 3  |
| T   | 6 | 84.091               | 1002.476 | 221.113 | 485.410              | 2  |
| T   | 7 | ---                  | ---      | 120.066 | ---                  | 1  |
