# Supplementary material
Source: PubMed Central journal article supplement (PMC5549630)

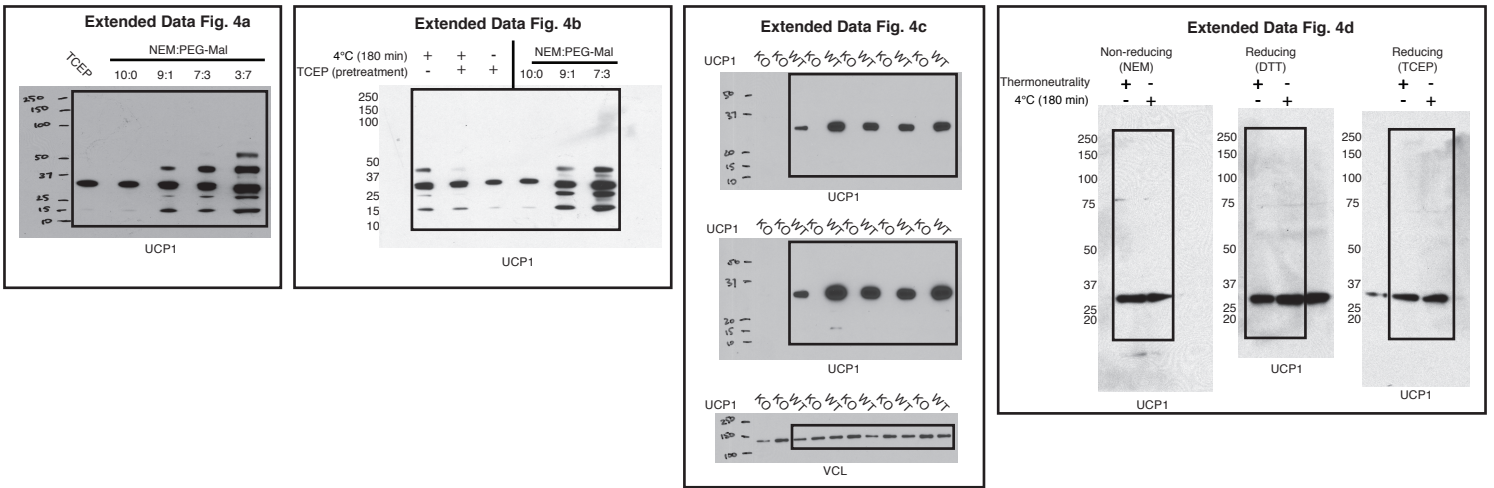

**Supplementary Figure 2: Uncropped scans with size marker indications, Extended Data Fig. 4**

Supplement: NIHMS757974-supplement-supp_fig2.pdf [file NIHMS757974-supplement-supp_fig2.pdf]

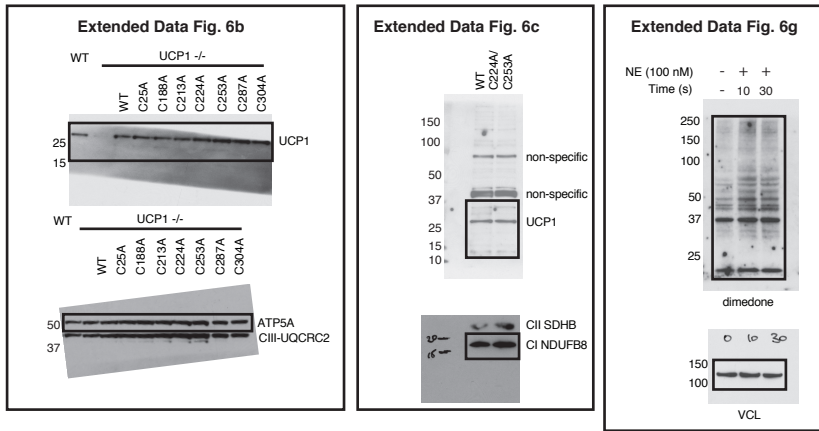

**Supplementary Figure 3: Uncropped scans with size marker indications, Extended Data Fig. 6**

Supplement: NIHMS757974-supplement-supp_fig3.pdf [file NIHMS757974-supplement-supp_fig3.pdf]
